# Supplementary material
Source: Springer Nature journal article supplement (https://www.springermedizin.de/resource/supplementary/12885_2012_3682_MOESM2_ESM.pdf/9464144)
Supplement: MOESM2 [file 9464144]

**Supplementary table 1 Complete DTC status at all time points for BM2 positive patients**

|    | Patient Number | BM1 | BM1 #DTC | BM2 #DTC | BM3           | BM3 #DTC      | BM4           | BM4 #DTC      |
|----|----------------|-----|----------|----------|---------------|---------------|---------------|---------------|
| 1  | 20             | neg | 0 DTC    | 2 DTC    | neg           | 0 DTC         | neg           | 0 DTC         |
| 2  | 32             | neg | 0 DTC    | 1 DTC    | neg           | 0 DTC         | neg           | 0 DTC         |
| 3  | 33             | neg | 0 DTC    | 2 DTC    | neg           | 0 DTC         | neg           | 0 DTC         |
| 4  | 35             | neg | 0 DTC    | 2 DTC    | neg           | 0 DTC         | neg           | 0 DTC         |
| 5  | 39             | neg | 0 DTC    | 3-9 DTC  | neg           | 0 DTC         | neg           | 0 DTC         |
| 6  | 40             | neg | 0 DTC    | 1 DTC    | pos           | 1 DTC         | neg           | 0 DTC         |
| 7  | 44             | neg | 0 DTC    | 1 DTC    | neg           | 0 DTC         | neg           | 0 DTC         |
| 8  | 45             | neg | 0 DTC    | 1 DTC    | pos           | 1 DTC         | neg           | 0 DTC         |
| 9  | 47             | neg | 0 DTC    | 3-9 DTC  | neg           | 0 DTC         | Not performed | Not performed |
| 10 | 65             | neg | 0 DTC    | 2 DTC    | neg           | 0 DTC         | neg           | 0 DTC         |
| 11 | 79             | pos | 1 DTC    | 1 DTC    | neg           | 0 DTC         | neg           | 0 DTC         |
| 12 | 86             | neg | 0 DTC    | 1 DTC    | neg           | 0 DTC         | pos           | 1 DTC         |
| 13 | 96             | neg | 0 DTC    | 1 DTC    | neg           | 0 DTC         | pos           | 1 DTC         |
| 14 | 97             | pos | 1 DTC    | 2 DTC    | Not performed | Not performed | Not performed | Not performed |
| 15 | 98             | neg | 0 DTC    | 1 DTC    | neg           | 0 DTC         | pos           | 1 DTC         |
| 16 | 115            | neg | 0 DTC    | 2 DTC    | neg           | 0 DTC         | neg           | 0 DTC         |
| 17 | 117            | pos | 1 DTC    | 1 DTC    | neg           | 0 DTC         | neg           | 0 DTC         |
| 18 | 128            | neg | 0 DTC    | 1 DTC    | neg           | 0 DTC         | neg           | 0 DTC         |
| 19 | 170            | pos | 1 DTC    | ≥10 DTC  | Not performed | Not performed | Not performed | Not performed |
| 20 | 171            | neg | 0 DTC    | 3-9 DTC  | neg           | 0 DTC         | neg           | 0 DTC         |
| 21 | 181            | neg | 0 DTC    | 1 DTC    | neg           | 0 DTC         | neg           | 0 DTC         |
| 22 | 185            | neg | 0 DTC    | 1 DTC    | pos           | 1 DTC         | pos           | 1 DTC         |
| 23 | 195            | neg | 0 DTC    | 1 DTC    | pos           | 1 DTC         | pos           | 1 DTC         |
| 24 | 202            | neg | 0 DTC    | ≥10 DTC  | pos           | ≥10 DTC       | Not performed | Not performed |

|    |     |     |         |         |                |               |               |               |
|----|-----|-----|---------|---------|----------------|---------------|---------------|---------------|
| 25 | 205 | neg | 0 DTC   | 1 DTC   | neg            | 0 DTC         | neg           | 0 DTC         |
| 26 | 236 | neg | 0 DTC   | 1 DTC   | neg            | 0 DTC         | neg           | 0 DTC         |
| 27 | 243 | neg | 0 DTC   | 1 DTC   | Not performed  | Not performed | Not performed | Not performed |
| 28 | 251 | neg | 0 DTC   | 2 DTC   | neg            | 0 DTC         | pos           | 2 DTC         |
| 29 | 259 | neg | 0 DTC   | 1 DTC   | neg            | 0 DTC         | neg           | 0 DTC         |
| 30 | 267 | neg | 0 DTC   | 2 DTC   | neg            | 0 DTC         | neg           | 0 DTC         |
| 31 | 277 | neg | 0 DTC   | 1 DTC   | neg            | 0 DTC         | neg           | 0 DTC         |
| 32 | 278 | neg | 0 DTC   | 1 DTC   | pos            | 1 DTC         | neg           | 0 DTC         |
| 33 | 280 | neg | 0 DTC   | ≥10 DTC | pos            | ≥10 DTC       | Not performed | Not performed |
| 34 | 311 | neg | 0 DTC   | 1 DTC   | neg            | 0 DTC         | neg           | 0 DTC         |
| 35 | 342 | neg | 0 DTC   | 2 DTC   | neg            | 0 DTC         | neg           | 0 DTC         |
| 36 | 343 | neg | 0 DTC   | ≥10 DTC | Not performed  | Not performed | Not performed | Not performed |
| 37 | 366 | pos | 1 DTC   | 1 DTC   | pos            | 1 DTC         | neg           | 0 DTC         |
| 38 | 383 | neg | 0 DTC   | 1 DTC   | Not performed  | Not performed | Not performed | Not performed |
| 39 | 396 | neg | 0 DTC   | 1 DTC   | neg            | 0 DTC         | neg           | 0 DTC         |
| 40 | 440 | pos | ≥10 DTC | 2 DTC   | Not performed. | Not performed | pos           | 1 DTC         |
| 41 | 477 | neg | 0 DTC   | ≥10 DTC | Not performed  | Not performed | Not performed | Not performed |
| 42 | 512 | neg | 0 DTC   | 1DTC    | neg            | 0 DTC         | neg           | 0 DTC         |
| 43 | 562 | pos | ≥10 DTC | ≥10 DTC | pos            | ≥10 DTC       | Not performed | Not performed |
| 44 | 569 | neg | 0 DTC   | 1DTC    | Not performed  | Not performed | Not performed | Not performed |
| 45 | 578 | neg | 0 DTC   | 3-9 DTC | neg            | 0 DTC         | neg           | 0 DTC         |
| 46 | 587 | neg | 0 DTC   | 1 DTC   | Not performed  | Not performed | Not performed | Not performed |
| 47 | 601 | neg | 0 DTC   | 3-9 DTC | neg            | 0 DTC         | neg           | 0 DTC         |
| 48 | 613 | neg | 0 DTC   | 2 DTC   | neg            | 0 DTC         | neg           | 0 DTC         |
| 49 | 630 | neg | 0 DTC   | 1 DTC   | pos            | 1 DTC         | neg           | 0 DTC         |
| 50 | 648 | neg | 0 DTC   | 1 DTC   | neg            | 0 DTC         | neg           | 0 DTC         |
| 51 | 661 | neg | 0 DTC   | 1 DTC   | neg            | 0 DTC         | neg           | 0 DTC         |
| 52 | 669 | neg | 0 DTC   | 2 DTC   | neg            | 0 DTC         | neg           | 0 DTC         |

|    |      |     |         |         |               |               |               |               |
|----|------|-----|---------|---------|---------------|---------------|---------------|---------------|
| 53 | 677  | pos | 3-9 DTC | 3-9 DTC | neg           | 0 DTC         | neg           | 0 DTC         |
| 54 | 695  | pos | 2 DTC   | 3-9 DTC | neg           | 0 DTC         | pos           | 1 DTC         |
| 55 | 708  | neg | 0 DTC   | 1 DTC   | neg           | 0 DTC         | neg           | 0 DTC         |
| 56 | 740  | neg | 0 DTC   | 3-9 DTC | neg           | 0 DTC         | neg           | 0 DTC         |
| 57 | 751  | pos | 1 DTC   | ≥10 DTC | neg           | 0 DTC         | Not performed | Not performed |
| 58 | 755  | neg | 0 DTC   | 1 DTC   | neg           | 0 DTC         | neg           | 0 DTC         |
| 59 | 766  | neg | 0 DTC   | 1 DTC   | neg           | 0 DTC         | Not performed | Not performed |
| 60 | 786  | neg | 0 DTC   | 1 DTC   | neg           | 0 DTC         | neg           | 0 DTC         |
| 61 | 805  | neg | 0 DTC   | 1 DTC   | neg           | 0 DTC         | neg           | 0 DTC         |
| 62 | 813  | neg | 0 DTC   | 2 DTC   | Not performed | Not performed | Not performed | Not performed |
| 63 | 821  | neg | 0 DTC   | 1 DTC   | neg           | 0 DTC         | neg           | 0 DTC         |
| 64 | 839  | neg | 0 DTC   | 2 DTC   | neg           | 0 DTC         | neg           | 0 DTC         |
| 65 | 852  | neg | 0 DTC   | 2 DTC   | neg           | 0 DTC         | neg           | 0 DTC         |
| 66 | 858  | neg | 0 DTC   | 3-9 DTC | neg           | 0 DTC         | neg           | 0 DTC         |
| 67 | 878  | pos | 1 DTC   | 1 DTC   | neg           | 0 DTC         | neg           | 0 DTC         |
| 68 | 895  | neg | 0 DTC   | 1 DTC   | neg           | 0 DTC         | neg           | 0 DTC         |
| 69 | 908  | neg | 0 DTC   | 3-9 DTC | neg           | 0 DTC         | neg           | 0 DTC         |
| 70 | 928  | neg | 0 DTC   | 1 DTC   | neg           | 0 DTC         | neg           | 0 DTC         |
| 71 | 929  | neg | 0 DTC   | 1 DTC   | neg           | 0 DTC         | neg           | 0 DTC         |
| 72 | 964  | neg | 0 DTC   | ≥10 DTC | Not performed | Not performed | Not performed | Not performed |
| 73 | 983  | neg | 0 DTC   | 1 DTC   | neg           | 0 DTC         | pos           | 1 DTC         |
| 74 | 1009 | neg | 0 DTC   | 2 DTC   | neg           | 0 DTC         | Not performed | Not performed |
| 75 | 1031 | neg | 0 DTC   | 1 DTC   | pos           | 3-9 DTC       | neg           | 0 DTC         |
| 76 | 1045 | pos | 2 DTC   | 2 DTC   | neg           | 0 DTC         | neg           | 0 DTC         |
| 77 | 1049 | neg | 0 DTC   | 1 DTC   | Not performed | Not performed | Not performed | Not performed |
| 78 | 1054 | pos | 1 DTC   | 3-9 DTC | neg           | 0 DTC         | neg           | 0 DTC         |
| 79 | 1061 | pos | 1 DTC   | 1 DTC   | pos           | 2 DTC         | Not performed | Not performed |
| 80 | 1062 | neg | 0 DTC   | ≥10 DTC | neg           | 0 DTC         | neg           | 0 DTC         |

|    |      |     |       |         |     |       |     |         |
|----|------|-----|-------|---------|-----|-------|-----|---------|
| 81 | 1078 | neg | 0 DTC | 2 DTC   | neg | 0 DTC | pos | 1 DTC   |
| 82 | 1100 | neg | 0 DTC | 1 DTC   | neg | 0 DTC | neg | 0 DTC   |
| 83 | 1122 | pos | 2 DTC | 3-9 DTC | neg | 0 DTC | pos | 3-9 DTC |

|
